# Supplementary material for: Metal ion binding and tolerance of bacteria cells in view of sensor applications
Source: Copernicus journal article supplement (doi:10.5194/jsss-7-433-2018), 2018-07-06
Supplement: Supplementary file 1 [file jsss-7-433-2018-supplement.pdf]

Supplement of J. Sens. Sens. Syst., 7, 433–441, 2018  
<https://doi.org/10.5194/jsss-7-433-2018-supplement>  
© Author(s) 2018. This work is distributed under  
the Creative Commons Attribution 4.0 License.

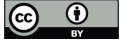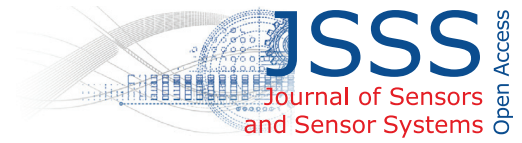

*Supplement of*

## **Metal ion binding and tolerance of bacteria cells in view of sensor applications**

**Jonas Jung et al.**

*Correspondence to:* Jonas Jung ([jonas.jung@tu-dresden.de](mailto:jonas.jung@tu-dresden.de))

The copyright of individual parts of the supplement might differ from the CC BY 4.0 License.

The pH values were measured with a pH meter (Sevencompact, Mettler-Toledo GmbH, Giessen, Germany) after two days both with and without incubated bacteria cells (Table 1).

5

**Table 1: pH values of metal salt solutions of different concentrations incubated for two days with bacteria cells of *L. sphaericus* JG-B53 and *S. ureae* ATCC 13881.**

|                                       | concentration<br>[mol/l] | no cells | <i>L. sphaericus</i> JG-B53 | <i>S. ureae</i> ATCC 13881 |
|---------------------------------------|--------------------------|----------|-----------------------------|----------------------------|
| <b>CuSO<sub>4</sub></b>               | 1x10 <sup>-1</sup>       | 4.01     | 3.92                        | 3.89                       |
|                                       | 1x10 <sup>-2</sup>       | 4.55     | 4.23                        | 4.19                       |
|                                       | 1x10 <sup>-3</sup>       | 5.01     | 5.40                        | 5.82                       |
| <b>HAuCl<sub>4</sub></b>              | 2.5x10 <sup>-3</sup>     | 2.37     | 2.02                        | 2.04                       |
| <b>Ho(NO<sub>3</sub>)<sub>3</sub></b> | 1x10 <sup>-1</sup>       | 6.42     | 5.06                        | 5.29                       |
|                                       | 1x10 <sup>-2</sup>       | 6.15     | 5.02                        | 4.77                       |
|                                       | 1x10 <sup>-3</sup>       | 6.27     | 5.52                        | 6.64                       |
| <b>KAuCl<sub>4</sub></b>              | 1x10 <sup>-2</sup>       | 2.73     | 2.23                        | 2.19                       |
|                                       | 1x10 <sup>-3</sup>       | 3.14     | 3.03                        | 3.11                       |
| <b>Sm(NO<sub>3</sub>)<sub>3</sub></b> | 1x10 <sup>-1</sup>       | 5.18     | 4.00                        | 4.24                       |
|                                       | 1x10 <sup>-2</sup>       | 5.34     | 4.19                        | 4.28                       |
|                                       | 1x10 <sup>-3</sup>       | 5.25     | 7.34                        | 6.42                       |
| <b>YCl<sub>3</sub></b>                | 1x10 <sup>-1</sup>       | 4.82     | 4.06                        | 4.37                       |
|                                       | 1x10 <sup>-2</sup>       | 5.13     | 4.59                        | 5.09                       |
|                                       | 1x10 <sup>-3</sup>       | 5.09     | 6.10                        | 6.37                       |

Figure 1 shows the washed cells of *L. sphaericus* JG-B53 and *S. ureae* ATCC 13881 in ddH<sub>2</sub>O after two days of incubation.

10 A sedimentation of cells at the bottom of the tube is visible, which is more pronounced in the *S. ureae* sample.

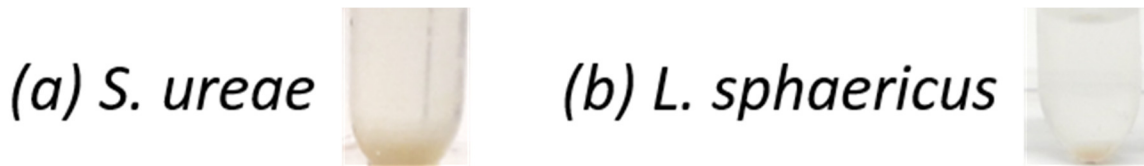

**Figure 1: Washed cells of *L. sphaericus* JG-B53 and *S. ureae* ATCC 13881 in water after 2 days incubation.**

Bacteria cells incubated with metal salt solutions for two days were studied by SEM (Figure 2 - 5).

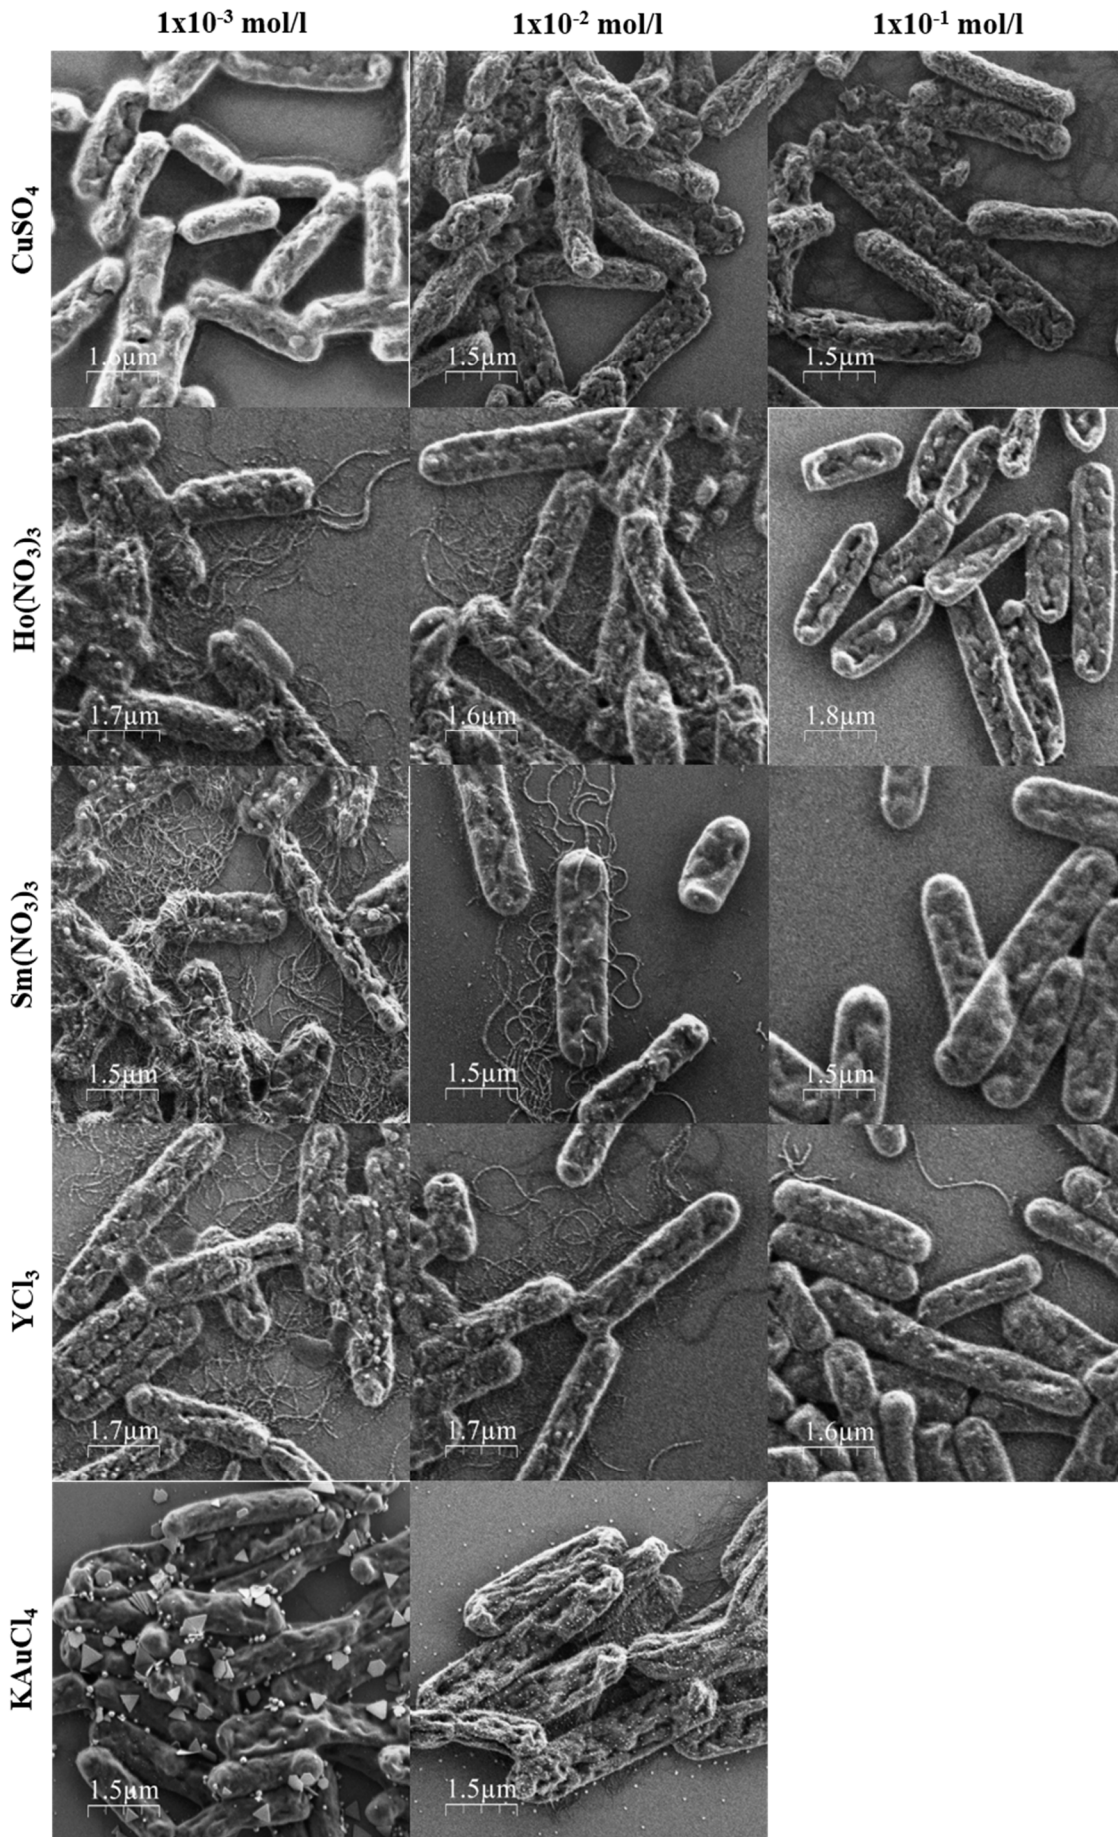

Figure 2: SEM images from *L. sphaericus* JG-B53 cells from metal binding test after 2 day incubation with  $\text{CuSO}_4$ ,  $\text{Ho}(\text{NO}_3)_3$ ,  $\text{Sm}(\text{NO}_3)_3$ ,  $\text{YCl}_3$  or  $\text{KAuCl}_4$  solutions of different concentrations.

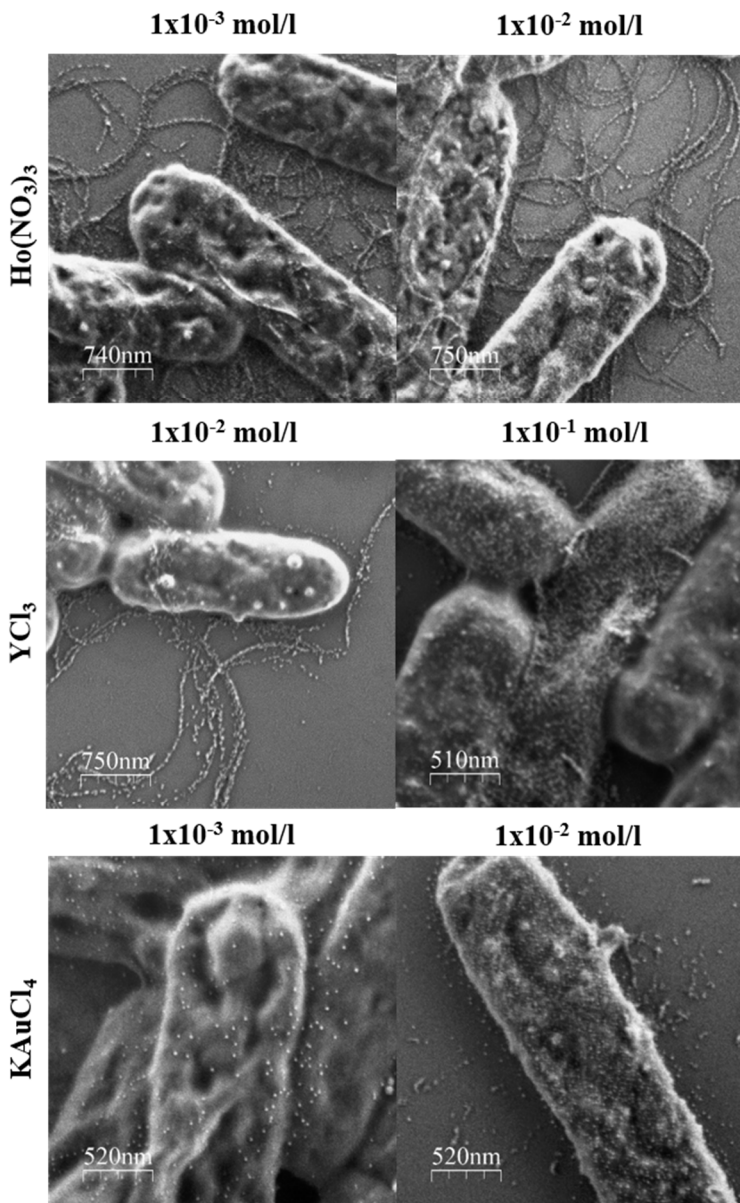

Figure 3: Higher resolution SEM images from *L. sphaericus* JG-B53 cells from metal binding test after 2 day incubation with  $\text{Ho}(\text{NO}_3)_3$ ,  $\text{YCl}_3$  or  $\text{KAuCl}_4$  solutions of different concentrations.

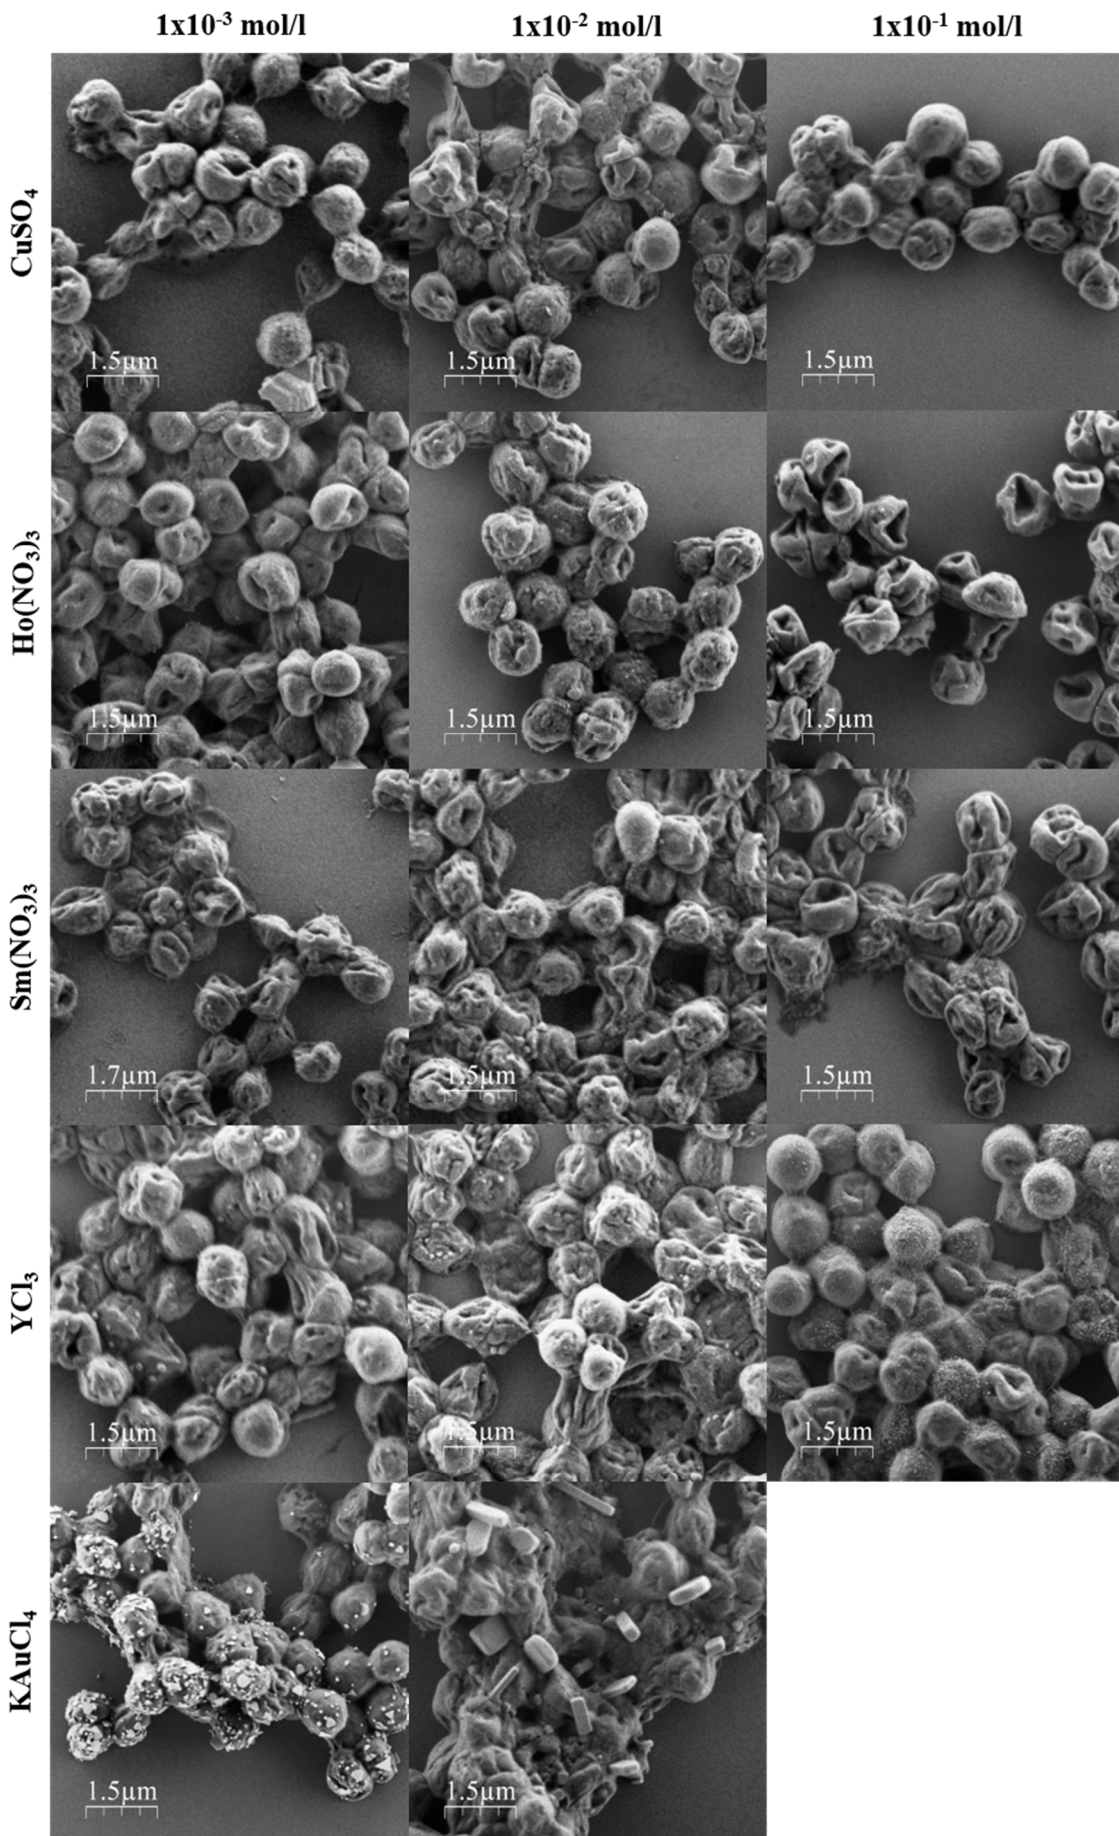

Figure 4: SEM images from *S. ureae* ATCC 13881 cells from metal binding test after 2 day incubation with  $\text{CuSO}_4$ ,  $\text{Ho}(\text{NO}_3)_3$ ,  $\text{Sm}(\text{NO}_3)_3$ ,  $\text{YCl}_3$  or  $\text{KAuCl}_4$  solutions of different concentrations.

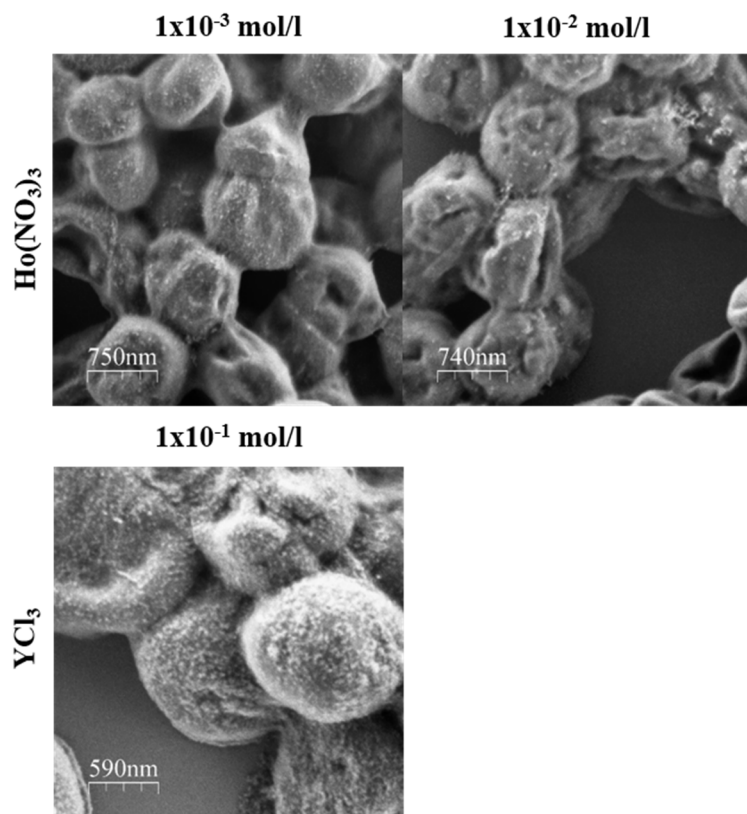

**Figure 5: Higher resolution SEM images from *S. ureae* ATCC 13881 cells from metal binding test after 2 day incubation with,  $\text{Ho}(\text{NO}_3)_3$  or  $\text{KAuCl}_4$  solutions of different concentrations.**
